# Supplementary material
Source: Research Square preprint supplement (doi:10.21203/rs.3.rs-9944032/v1)
Supplement: Supplementary file 1 [file e20230f026d37d3b3c6d6cd0.docx]

**Supplementary Material** - Search strategies

| **Database** | **Research strategy** |
| --- | --- |
| Scopus | KEY ( ( ( "artificial intelligence" OR AI OR "computational intelligence" OR "augmented intelligence" OR "intelligent system*" OR "expert system*" OR "machine learning" OR ML OR "supervised learning" OR "unsupervised learning" OR "semi-supervised learning" OR "reinforcement learning" OR "ensemble learning" OR "transfer learning" OR "federated learning" OR "deep learning" OR DL OR "deep neural network*" OR DNN OR DNNs OR "artificial neural network*" OR ANN OR ANNs OR "neural network*" OR "convolutional neural network*" OR CNN OR CNNs OR ResNet OR "U-Net" OR "encoder-decoder" OR "recurrent neural network*" OR RNN OR LSTM OR transformer* OR "foundation model*" OR "large language model*" OR LLM OR BERT OR BioBERT OR GPT OR "support vector machine" OR SVM OR "random forest" OR XGBoost OR "decision tree" OR "generative adversarial network*" OR GAN OR DCGAN OR "explainable AI" OR XAI OR "model interpretability" OR LIME OR SHAP OR "Integrated Gradients" OR "saliency map" OR "attention map" OR "computer vision" OR "image analysis" OR "medical image analysis" OR "image classification" OR "object detection" OR "image segmentation" OR "automated segmentation" OR "tumor segmentation" OR "pattern recognition" OR "quantitative imaging" OR radiomics OR radiomic* OR radiogenomics OR "natural language processing" OR NLP OR "text mining" OR "data mining" OR bioinformatics OR "omics analysis" OR genomics OR transcriptomics OR proteomics OR "feature extraction" OR "feature engineering" OR "representation learning" OR "predictive model*" OR "predictive analytic*" OR "data-driven model*" OR "prognostic model*" OR "outcome prediction" OR "survival prediction" OR "treatment response prediction" OR "risk stratification" OR "precision medicine" OR "personalized medicine" OR "clinical decision support" OR "decision support system*" OR "computer-assisted diagnosis" OR "computer-aided diagnosis" OR "computer-aided detection" OR "computer-assisted detection" OR CAD ) AND ( "pituitary adenoma*" OR "pituitary tumor*" OR "pituitary tumour*" OR "pituitary neoplasm*" OR "pituitary gland neoplasm*" OR "pituitary lesion*" OR "pituitary neuroendocrine tumor*" OR "pituitary neuroendocrine tumour*" OR PitNET OR PitNETs OR "hypophyseal adenoma*" OR "hypophyseal tumor*" OR "sellar tumor*" OR "sellar tumour*" OR prolactinoma* OR "prolactin-secreting adenoma*" OR "lactotrophs adenoma*" OR "growth hormone-secreting adenoma*" OR "GH-secreting adenoma*" OR "somatotropin adenoma*" OR "somatotropic adenoma*" OR "ACTH-secreting adenoma*" OR "corticotroph adenoma*" OR "corticotropin adenoma*" OR "Cushing disease" OR "TSH-secreting adenoma*" OR thyrotrophinoma* OR "thyrotropin adenoma*" OR "gonadotroph adenoma*" OR "gonadotropic adenoma*" OR "functioning pituitary adenoma*" OR "functional pituitary adenoma*" OR "nonfunctioning pituitary adenoma*" OR "non-functioning pituitary adenoma*" OR NFPA OR "silent pituitary adenoma*" ) ) ) AND ( LIMIT-TO ( DOCTYPE , "ar" ) ) AND ( LIMIT-TO ( LANGUAGE , "English" ) OR LIMIT-TO ( LANGUAGE , "Spanish" ) ) AND ( LIMIT-TO ( SRCTYPE , "j" ) ) AND ( LIMIT-TO ( PUBSTAGE , "final" ) ) |
| PubMed/MEDLINE | ( ( "Artificial Intelligence"[Mesh] OR "Machine Learning"[Mesh] OR "Deep Learning"[Mesh] OR "Neural Networks, Computer"[Mesh] OR "Natural Language Processing"[Mesh] OR "Computer-Assisted Image Interpretation"[Mesh] OR "artificial intelligence"[tiab] OR AI[tiab] OR "computational intelligence"[tiab] OR "augmented intelligence"[tiab] OR "intelligent system*"[tiab] OR "expert system*"[tiab] OR "machine learning"[tiab] OR ML[tiab] OR "supervised learning"[tiab] OR "unsupervised learning"[tiab] OR "semi-supervised learning"[tiab] OR "reinforcement learning"[tiab] OR "ensemble learning"[tiab] OR "transfer learning"[tiab] OR "federated learning"[tiab] OR "deep learning"[tiab] OR DL[tiab] OR "deep neural network*"[tiab] OR DNN[tiab] OR DNNs[tiab] OR "artificial neural network*"[tiab] OR ANN[tiab] OR ANNs[tiab] OR "neural network*"[tiab] OR "convolutional neural network*"[tiab] OR CNN[tiab] OR CNNs[tiab] OR ResNet[tiab] OR "U-Net"[tiab] OR "encoder-decoder"[tiab] OR "recurrent neural network*"[tiab] OR RNN[tiab] OR LSTM[tiab] OR transformer*[tiab] OR "foundation model*"[tiab] OR "large language model*"[tiab] OR LLM[tiab] OR BERT[tiab] OR BioBERT[tiab] OR GPT[tiab] OR "support vector machine"[tiab] OR SVM[tiab] OR "random forest"[tiab] OR XGBoost[tiab] OR "decision tree"[tiab] OR "generative adversarial network*"[tiab] OR GAN[tiab] OR DCGAN[tiab] OR "explainable AI"[tiab] OR XAI[tiab] OR "model interpretability"[tiab] OR LIME[tiab] OR SHAP[tiab] OR "Integrated Gradients"[tiab] OR "saliency map"[tiab] OR "attention map"[tiab] OR "computer vision"[tiab] OR "image analysis"[tiab] OR "medical image analysis"[tiab] OR "image classification"[tiab] OR "object detection"[tiab] OR "image segmentation"[tiab] OR "automated segmentation"[tiab] OR "tumor segmentation"[tiab] OR "pattern recognition"[tiab] OR "quantitative imaging"[tiab] OR radiomics[tiab] OR radiomic*[tiab] OR radiogenomics[tiab] OR "natural language processing"[tiab] OR NLP[tiab] OR "text mining"[tiab] OR "data mining"[tiab] OR bioinformatics[tiab] OR "omics analysis"[tiab] OR genomics[tiab] OR transcriptomics[tiab] OR proteomics[tiab] OR "feature extraction"[tiab] OR "feature engineering"[tiab] OR "representation learning"[tiab] OR "predictive model*"[tiab] OR "predictive analytic*"[tiab] OR "data-driven model*"[tiab] OR "prognostic model*"[tiab] OR "outcome prediction"[tiab] OR "survival prediction"[tiab] OR "treatment response prediction"[tiab] OR "risk stratification"[tiab] OR "precision medicine"[tiab] OR "personalized medicine"[tiab] OR "clinical decision support"[tiab] OR "decision support system*"[tiab] OR "computer-assisted diagnosis"[tiab] OR "computer-aided diagnosis"[tiab] OR "computer-aided detection"[tiab] OR "computer-assisted detection"[tiab] OR CAD[tiab] ) AND ( "Pituitary Neoplasms"[Mesh] OR "pituitary adenoma*"[tiab] OR "pituitary tumor*"[tiab] OR "pituitary tumour*"[tiab] OR "pituitary neoplasm*"[tiab] OR "pituitary gland neoplasm*"[tiab] OR "pituitary lesion*"[tiab] OR "pituitary neuroendocrine tumor*"[tiab] OR "pituitary neuroendocrine tumour*"[tiab] OR PitNET[tiab] OR PitNETs[tiab] OR "hypophyseal adenoma*"[tiab] OR "hypophyseal tumor*"[tiab] OR "sellar tumor*"[tiab] OR "sellar tumour*"[tiab] OR prolactinoma*[tiab] OR "prolactin-secreting adenoma*"[tiab] OR "lactotroph adenoma*"[tiab] OR "growth hormone-secreting adenoma*"[tiab] OR "GH-secreting adenoma*"[tiab] OR "somatotroph adenoma*"[tiab] OR "somatotropic adenoma*"[tiab] OR "ACTH-secreting adenoma*"[tiab] OR "corticotroph adenoma*"[tiab] OR "corticotropic adenoma*"[tiab] OR "Cushing disease"[tiab] OR "TSH-secreting adenoma*"[tiab] OR thyrotrophinoma*[tiab] OR "thyrotroph adenoma*"[tiab] OR "gonadotroph adenoma*"[tiab] OR "gonadotropic adenoma*"[tiab] OR "functioning pituitary adenoma*"[tiab] OR "functional pituitary adenoma*"[tiab] OR "nonfunctioning pituitary adenoma*"[tiab] OR "non-functioning pituitary adenoma*"[tiab] OR NFPA[tiab] OR "silent pituitary adenoma*"[tiab] ) ) |
